# Supplementary material for: The role of intrasexual competition on the evolution of male-male courtship display: a systematic review
Source: PeerJ. 2023 Feb 2;10:e14638. doi: 10.7717/peerj.14638 (PMC9899439; doi:10.7717/peerj.14638)
Supplement: Supplemental Information 1 [file peerj-11-14638-s001.xlsx]

## Sheet: Table S1_RLast
Class	Species	Hypotheses		Hypotheses classification	References
in general		practice			Skinner et al. (2016)
Actinopterygii
	Oreochromis mossambicus	displaced behaviour	(high sexual motivation)	competition	Amorim et al. (2003)
		mistaken identity
		competition	(high competition environment / male-male encounters)		Oliveira and Almada (1998)
	Poecillia reticulata	none		none	Bailey and Zuk (2009)
	Pungitius pungitius	none		none	Oliveira and Almada (1998)
Arachnida				other
	Oedothorax fuscus	mistaken identity			Scharf and Martin (2013)
	Oedothorax gibbosus	mistaken identity		other
Aves
	in general	competition	(high competition environment / male-male encounters)		MacFarlane et al. (2010)
		early experience	(high competition environment / male-male encounters)
			(isolation/no opportunity to mate)
		displaced behaviour	(high competition environment / male-male encounters)
	altricial birds	early experience			MacFarlane et al. (2007)
	precocial birds	abnormal behaviour	(high competition environment / male-male encounters)
	Penguins (in general)	against mistaken identity			Pincemy et al. (2010)
	Anas discors	none		none	MacFarlane et al. (2007, 2010)
	Anas platyrhynchos	none		none
	Anser anser	none		none
	Apenodytes patagonicus	against mistaken identity		none	Pincemy et al. (2010)
	Aratinga (Eupsittula) canicularis	none		none	MacFarlane et al. (2007, 2010)
	Biziura lobata	none		none
	Branta canadensis	none		none	MacFarlane et al. (2007)
	Callaeas cinerea	none		none	MacFarlane et al. (2010)
	Calypte anna	none		none	MacFarlane et al. (2007, 2010)
	Chiroxiphia caudata	none		none
	Chiroxiphia pareola	none		none
	Chlamydera maculata	none		none
	Columba livia (f. urbana)	displaced behaviour	(isolation/no opportunity to mate - prison effect)	other	Jankowiak et al. (2018)
	Cygnus atratus	competition	(territory/resource defence)	competition	MacFarlane et al. (2010)
			(social conflict / aggression)
		social glue
		none			MacFarlane et al. (2007)
	Dinopium benghalense	none		none	MacFarlane et al. (2010)
	Diomedea (Phoebastria) immutabilis	none		none	MacFarlane et al. (2007, 2010)
	Euplectes orix	none		none
	Falco tinnunculus	none		none
	Fringilla coelebs	none		none
	Gymnopithys bicolor (leucaspis)	none		none
Class	Species	Hypotheses			Reference
Aves	Haematopus ostralegus	none		none
	Larus (Chroicocephalus) ridibundus	none		none	MacFarlane et al. (2007, 2010)
	Larus (Leucophaeus) atricilla	none		none	MacFarlane et al. (2007, 2010)
	Melanerpes formicivorus	competition	(inhibit aggression)	competition	MacFarlane et al. (2010)
		none			MacFarlane et al. (2007)
	Melopsittacus undulatus	competition	(assess other condition)	competition	Abbassi and Burley (2012)
	Menura novaehollandiae	abnormal behaviour	(high competition environment / male-male encounters)	other	MacFarlane et al. (2010)
		none			MacFarlane et al. (2007)
	Mionectes oleagineus	none		none	MacFarlane et al. (2007, 2010)
	Parotia lawesii	none		none	MacFarlane et al. (2010)
	Perissocephalus tricolor	none		none	MacFarlane et al. (2007, 2010)
	Phaenostictus mcleannani	none		none
	Phaethornis superciliosus	none		none
	Phalacrocorax aristotelis	none		none
	Phalacrocorax carbo	none		none
	Philomachus pugnax	none		none
	Pica pica	none		none
	Pluvialis apricaria	none		none
	Poephila acuticauda	competition		competition	Adachi and Soma (2019)
	Poliocephalus poliocephalus	none		none	MacFarlane et al. (2007, 2010)
	Porphyrio porphyrio	none		none
	Ptilonorhynchus violaceus	practice		competition	MacFarlane et al. (2010)
		competition	(high competition environment / male-male encounters)
		none			MacFarlane et al. (2007)
	Ptiloris magnificus	none		none	MacFarlane et al. (2007, 2010)
	Ptiloris victoriae	none		none
	Pygoscelis adeliae	none		none
	Pygoscelis papua	none		none
	Riparia riparia	none		none	MacFarlane et al. (2010)
	Rupicola rupicola	competition	(high competition environment / male-male encounters)	competition	MacFarlane et al. (2010)
		none			MacFarlane et al. (2007)
	Scenopoeetes dentirostris	none		none	MacFarlane et al. (2007)
	Scopus umbretta	none		none	MacFarlane et al. (2007, 2010)
	Sericulus chrysocephalus	none		none	MacFarlane et al. (2007, 2010)
	Sialia sialis	none		none	MacFarlane et al. (2007, 2010)
	Struthio camelus	none		none	MacFarlane et al. (2007, 2010)
	Taeniopygia guttata	competition	(territory/resource defence)	competition	Elie et al. (2011)
	Tringa nebularia	none		none	MacFarlane et al. (2007, 2010)
	Tringa totanus	none		none	MacFarlane et al. (2007, 2010)
	Tryngites subruficollis	none		none	MacFarlane et al. (2007)
Insecta
	in general	mistaken identity			Scharf and Martin (2013)
Class	Species	Hypotheses			Reference
Insecta	in general	competition	(dominance / sexual interference)		Wang et al. (2011a)
	Beetles, flies (table 1)	abnormal behaviour	(artificial environment)		Scharf and Martin (2013)
	Drosophila	none			Chen et al. (2012); Chertemps et al. (2012); Certel et al. (2010); Liu et al. (2008a); Kitamoto (2002); Hing and Carlson (1996)
		thermoregulation			Liu et al. (2009)
		byproduct	(genes)		Zhang and Odenwald (1995)
		against mistaken identity			Wang et al. (2011b)
	Acraea andromacha	none		none	Caballero-Mendietaa and Cordero (2012)
	Aegus chelifer chelifer	mistaken identity		other	Songvorawit et al. (2019)
	Allomyrina dichotoma septentrionalis	abnormal behaviour	(artificial environment)	other	Scharf and Martin (2013)
		mistaken identity
	Anomalochrysa maclachlani	none		none
	Aphidius ervi	competition	(sexual interference)	competition	Scharf and Martin (2013)
		mistaken identity
	Bactrocera oleae	mistaken identity		other	Benelli et al. (2013)
	Bemisia tabaci	mistaken identity		other	Scharf and Martin (2013)
	Bicyclus anynana	none		none	Caballero-Mendietaa and Cordero (2012)
	Byrsotria fumigata	mistaken identity		competition	Scharf and Martin (2013)
		competition	(sexual interference)
			(female defence)
	Cephalonomia tarsalis	competition	(sexual interference)	competition	Scharf and Martin (2013)
	Ceratitis capitata	mistaken identity		other	Scharf and Martin (2013)
	Cerotainia albipilosa	mistaken identity		other	Scharf and Martin (2013)
	Choristoneura fumifera	mistaken identity		other	Scharf and Martin (2013)
		none			Caballero-Mendietaa and Cordero (2012)
	Chrysoperla lucasina	mistaken identity		other	Scharf and Martin (2013)
	Ciulfina biseriata	against mistaken identity		none	Scharf and Martin (2013)
	Cotesia rubecula	mistaken identity		competition	Scharf and Martin (2013)
		competition	(territory/resource defence)
	Dacus cucurbitae	mistaken identity		other	Scharf and Martin (2013)
	Danaus gilippus (berenice)	none		none	Caballero-Mendietaa and Cordero (2012)
	Drosophila persimilis	byproduct	(genes)	other	Dai et al. (2008)
	Drosophila affinis	mistaken identity		other	Scharf and Martin (2013)
		practice
	Drosophila ananassae	byproduct	(genes)	other	Dai et al. (2008)
Class	Species	Hypotheses			Reference
Insecta
	Drosophila birchii	mistaken identity		other	Scharf and Martin (2013)
		practice
	Drosophila erecta	byproduct	(genes)	other	Dai et al. (2008)
	Drosophila heteroneura	mistaken identity		other	Scharf and Martin (2013)
	Drosophila melanogaster	mistaken identity		other	Vijayan et al. (2014); Scharf and Martin (2013); Toda et al. (2012); Meissner et al. (2011); Agrawal and Riffell (2011); Dukas (2010); Liu et al. (2020)
			(between species)		Zhan et al. (2021)
		byproduct	(genes)		Vijayan et al. (2014); Ganter et al. (2011); Anaka et al. (2008); Sellami et al. (2012)
			(physiology)		Yamamoto and Seto (2014)
		practice			Bailey and Zuk (2009)
		displaced or abnormal behaviour			Bailey and Zuk (2009); Chen et al. (2017); Deshpande et al. (2019); Eddison (2021); Flintham et al. (2018); Gupta et al. (2017); Liu et al. (2020); Silva et al. (2021); Xia et al. (2016)
			(high competition environment / male-male encounters)		Bailey et al. (2013)
			(high sexual motivation)		Krstic et al. (2013)
			(induced/rare mutations)		Weng et al. (2013); Wang et al. (2011a)
		none			Ejima (2015); Hoskins et al. (2015); Dalton et al. (2009); Dai et al. (2008); Liu et al. (2008a, b); Chan and Kravitz (2007); Lacaille et al. (2007); Gaines et al. (2000); Crossley et al. (1995)
		early experience			Meissner et al. (2011)
		against sexual preference
		thermoregulation			Ganter et al. (2007)
		against sexual preference			Meissner et al. (2011)
	Drosophila montana	mistaken identity		other	Scharf and Martin (2013)
	Drosophila paulistorum	none		none	Scharf and Martin (2013)
	Drosophila sechellia	none		none	Dai et al. (2008)
	Drosophila serrata	none		none	Scharf and Martin (2013)
	Drosophila silvestris	mistaken identity		other	Scharf and Martin (2013)
	Drosophila simulans	none		none	Dai et al. (2008)
	Drosophila virilis	none		none	Dai et al. (2008)
	Drosophila willistoni	none		none	Dai et al. (2008)
	Drosophila yakuba	none		none	Dai et al. (2008)
	Euleia fratria	none		none	Scharf and Martin (2013)
Class	Species	Hypotheses			Reference
Insecta	Euphydryas editha	none		competition	Caballero-Mendietaa and Cordero (2012)
		mistaken identity			Scharf and Martin (2013)
		competition	(sexual interference)
	Eupoecilia ambiguella	none		competition	Caballero-Mendietaa and Cordero (2012)
		mistaken identity			Scharf and Martin (2013)
		competition	(territory/resource defence)
	Eurycotis floridana	mistaken identity		other	Scharf and Martin (2013)
	Euscepes postfasciatus	mistaken identity		other	Isa et al. (2019)
	Glossina morsitans morsitans	mistaken identity		other	Scharf and Martin (2013)
	Gnatocerus cornutus	competition		competition	Lane et al. (2016)
	Grapholitha molesta	mistaken identity		other	Scharf and Martin (2013)
	Gromphadorhina portentosa	none		none	Logue et al. (2009)
	Gryllus bimaculatus	abnormal behaviour	(handicap)	other	Murakami and Itoh (2003)
	Gryllus veletis	byproduct	(traits)	other	Boutin et al. (2016)
		against competition
	Hermetia illucens	mistaken identity		other	Giunti et al. (2019)
	Hylobittacus apicalis	mistaken identity		other	Scharf and Martin (2013)
	Ischnura elegans	none		none	Monk et al. (2019)
	Junonia coenia	none		none	Caballero-Mendietaa and Cordero (2012)
	Lariophagus distinguendus	mistaken identity		other	Scharf and Martin (2013)
	Magicicada cassini	mistaken identity		other	Scharf and Martin (2013)
	Magicicada septendecim	mistaken identity		other	Scharf and Martin (2013)
	Megacopta punctatissima	mistaken identity		other	Scharf and Martin (2013)
	Musca domestica	mistaken identity		other	Scharf and Martin (2013)
	Periplaneta americana	mistaken identity		other	Scharf and Martin (2013)
	Periplaneta brunnea	mistaken identity		other	Scharf and Martin (2013)
	Phytoecia rufiventris	mistaken identity		other	Scharf and Martin (2013); Wang et al. (1996)
	Pieris rapae crucivora	mistaken identity		other	Scharf and Martin (2013)
	Piezodorus hybneri	none		none	Scharf and Martin (2013)
	Prochyliza xanthostoma	mistaken identity		other	Scharf and Martin (2013)
	Protophormia terrae-novae	mistaken identity		other	Scharf and Martin (2013)
	Psyttalia concolor	none		other	Benelli et al. (2012)
		practice			Benelli and Canale (2013)
		mistaken identity			Scharf and Martin (2013)
	Rhagoletis mendax	none		none	Scharf and Martin (2013)
Class	Species	Hypotheses			Reference
Insecta	Teleogryllus occipitalis	competition	(defence)	competition	Kuriwada (2017)
	Teleogryllus oceanicus	mistaken identity		other	Bailey and French (2012); Scharf and Martin (2013); Rayner and Bailey (2019)
		none			Monk et al. (2019)
		against competition			Rayner and Bailey (2019)
		byproduct	(sexual motivation / libido)
	Thyanta pallidovirens	mistaken identity		other	Scharf and Martin (2013)
	Thymelicus lineola	none			Pivnick et al. (1992)
Mammalia
	Barbastella barbastellus	none		none	Riccucci (2011)
	Capra hircus	competition	(dominance)	competition	Ungerfeld et al. (2014)
		displaced behaviour	(isolation / no opportunity to mate - prison effect)
	Corynorhinus rafinesquii	mistaken identity		other	Riccucci (2011)
		abnormal behaviour	(artificial environment)		Riccucci (2011)
	Desmodus rotundus	abnormal behaviour	(artificial environment)	other	Riccucci (2011)
	Eptesicus serotinus	byproduct	(other behaviour - hibernation)	other	Riccucci (2011)
	Miniopterus schreibersii	none		none	Riccucci (2011)
	Myotis bechsteinii	none		none	Riccucci (2011)
	Myotis capaccinii	none		none	Riccucci (2011)
	Myotis daubentonii	none		none	Riccucci (2011)
	Myotis lucifugus	none		none	Riccucci (2011)
	Myotis myotis	byproduct	(other behaviour - hibernation)	other	Riccucci (2011)
	Myotis mystacinus	none		none	Riccucci (2011)
	Myotis nattereri	none		none	Riccucci (2011)
	Nyctalus leisleri	none		none	Riccucci (2011)
	Nyctalus noctula	mistaken identity		other	Riccucci (2011)
	Ovis aries	competition	(dominance)	competition	Ungerfeld et al. (2007)
		none			Bailey and Zuk (2009)
	Ovis canadensis	competition	(dominance, high competition environment / male-male encounters)	competition	Ungerfeld et al. (2007)
	Pipistrellus pipistrellus	none		none	Riccucci (2011)
	Plecotus auritus	none		none	Riccucci (2011)
	Pteropus giganteus	social glue		other	Riccucci (2011)
	Pteropus livingstonii	none		none	Riccucci (2011)
	Pteropus poliocephalus	none		none	Riccucci (2011)
	Pteropus rodricensis	none		none	Riccucci (2011)
	Rhinolophus ferrumequinum	none		none	Riccucci (2011)
	Rhinolophus hipposideros	none		none	Riccucci (2011)
Reptilia
	Testudo hermanni	displaced behaviour	(no opportunity to mate - prison effect)	other	Bonnet et al. (2016)
	Thamnophis sirtalis parietalis	against mistaken identity		competition	Bailey and Zuk (2009)
		thermoregulation
		competition	(territory/resource defence)
		mistaken identity			Shine et al. (2000)
